# Supplementary material
Source: HighWire-hosted journal article supplement (https://www.cmajopen.ca/highwire/filestream/81372/field_highwire_adjunct_files/1/2019-0167-1-at.pdf)
Supplement: 2019-0167-1-at.pdf [file 2019-0167-1-at.pdf]

Appendix 1: Percentage of eligible First Degree Relatives who have received carrier testing

| Gene         | Number First-Degree Relatives Eligible | Number First-Degree Relatives Tested | Percentage Tested | 95% Confidence Interval |
|--------------|----------------------------------------|--------------------------------------|-------------------|-------------------------|
| <i>MLH1</i>  | 220                                    | 80                                   | 36%               | 30 – 43%                |
| <i>MSH2</i>  | 166                                    | 51                                   | 31%               | 24 – 38%                |
| <i>MSH6</i>  | 116                                    | 27                                   | 23%               | 16 – 31%                |
| <i>PMS2</i>  | 36                                     | 8                                    | 22%               | 9 - 36%                 |
| <i>EPCAM</i> | 8                                      | 3                                    | 38%               | 4 - 71%                 |
| <i>APC</i>   | 116                                    | 46                                   | 40%               | 31 - 49%                |
| <i>MUTYH</i> | 28                                     | 3                                    | 11%               | -1 - 22%                |
| <i>PTEN</i>  | 45                                     | 14                                   | 31%               | 18 – 45%                |
| <i>SMAD4</i> | 6                                      | 3                                    | 50%               | 10 - 90%                |
| <i>STK11</i> | 18                                     | 8                                    | 44%               | 21 - 67%                |
| <i>TP53</i>  | 52                                     | 20                                   | 38%               | 25–52%                  |
| <i>CHEK2</i> | 10                                     | 5                                    | 50%               | 19 - 81%                |
| <i>TOTAL</i> | 821                                    | 268                                  | 33%               | 29 – 36%                |
